# Supplementary material for: Assessing the representation of the Australian carbon cycle in global vegetation models
Source: Copernicus journal article supplement (doi:10.5194/bg-2021-66), 2021-03-15
Supplement: Supplementary file [file bg-2021-66-AC1-supplement.pdf]

## Response to referee #1

We thank the reviewer for taking the time to review our manuscript and provide constructive comments. Below we address the reviewer's comments point by point. We add our replies in italics and highlight suggested modifications in the manuscript in red.

We further would like to acknowledge that while revising the manuscript, we noticed two minor errors in the original submission, which we have now fixed:

1. Figure 1d): For two models (ISBA-CTRIP and VISIT) the monthly CSoil pool was shown. We corrected the figure and now show the annual average for both models.
2. Figure 7c) and Table B3: We accidentally chose the wrong time period for the annual fire emissions and updated the figures with the corrected time period (2003-2018 for the TRENDY models and the observation data). We accordingly corrected Table B3. While the annual values for fire emissions and the associated uncertainty almost stay the same, the correlation coefficients between the TRENDY models and the observed data changed so that now all models are positively correlated with either of the two observation datasets on both timescales. We changed the text accordingly to:

*On monthly timescales, four TRENDY models capture some features in the variability in the satellite derived observations with either weak (ISBA-CTRIP and VISIT: both datasets; JSBACH: GFED4s), moderate (JSBACH: CAMS-GFAS; CLASS-CTEM: CAMS-GFAS) or high (CLASS-CTEM: GFED4s) significant correlation coefficients. The remaining models do not show a significant relationship to either of the datasets. Aggregated to annual values, the TRENDY models generally underestimated the fire CO<sub>2</sub> emissions and did not always capture the variability in, or timing of, extreme fire years (see fig. 7c). CLASS-CTEM, JSBACH and ISBA-CTRIP captured some features of the variability in the satellite derived observations. CLASS-CTEM is moderately correlated with both datasets ( $r > 0.5$ ), ISBA-CTRIP shows a significant moderate correlation with the GFED4s dataset only and JSBACH is highly correlated with both datasets ( $r > 0.7$ ; see table B3). The remaining models are not significantly linked the satellite derived observations.*

### General comments

Using the term "DGVM" is somewhat misleading because some of the models use prescribed PFT fractions. Explicitly identifying which models are truly DGVMs and which are not at the beginning instead of in the Future Directions section at the end might help a reader while digesting the figures.

*We agree with the reviewer. However, we followed the TRENDY nomenclature which states that the TRENDY project is a 'consortium of Dynamic Global Vegetation Model (DGVM) groups'. To clarify, we now list the models that simulate vegetation dynamically as opposed to those prescribing landcover in the section 2.1 Models and simulations (instead of the Future Directions). We hope this resolves the reviewer's concern.*

Some additional analyses that bring the separate sections together will help disentangle the results. Most importantly, more detailed analyses of the effect of PFT fraction might allow for

more informative conclusions. For instance, one conclusion is that differences in PFT fraction are largely responsible for differences in carbon storage and turnover time. Showing each model's NBP difference from the multi-model mean (and carbon storage and residence time) vs. the fraction of each PFT, either for every year or averaged over a number of years, would help understand the role of vegetation distribution on differences in the simulated response variables of interest.

We thank the reviewer for the suggestion. Given all models use different PFTs, we grouped the PFTs of the individual models into six common vegetation groups, i.e., evergreen trees, deciduous trees, C3 grasses (C3G), C4 grasses (C4G), C3 agriculture (C3 Crop) and C4 agriculture (C4 Crop). We exclude grid points where the landcover fraction of the vegetation group is less than 5%.

We looked at NBP (sum over 1901-2018) – ensemble mean vs the initial landcover fraction (1901-1930):

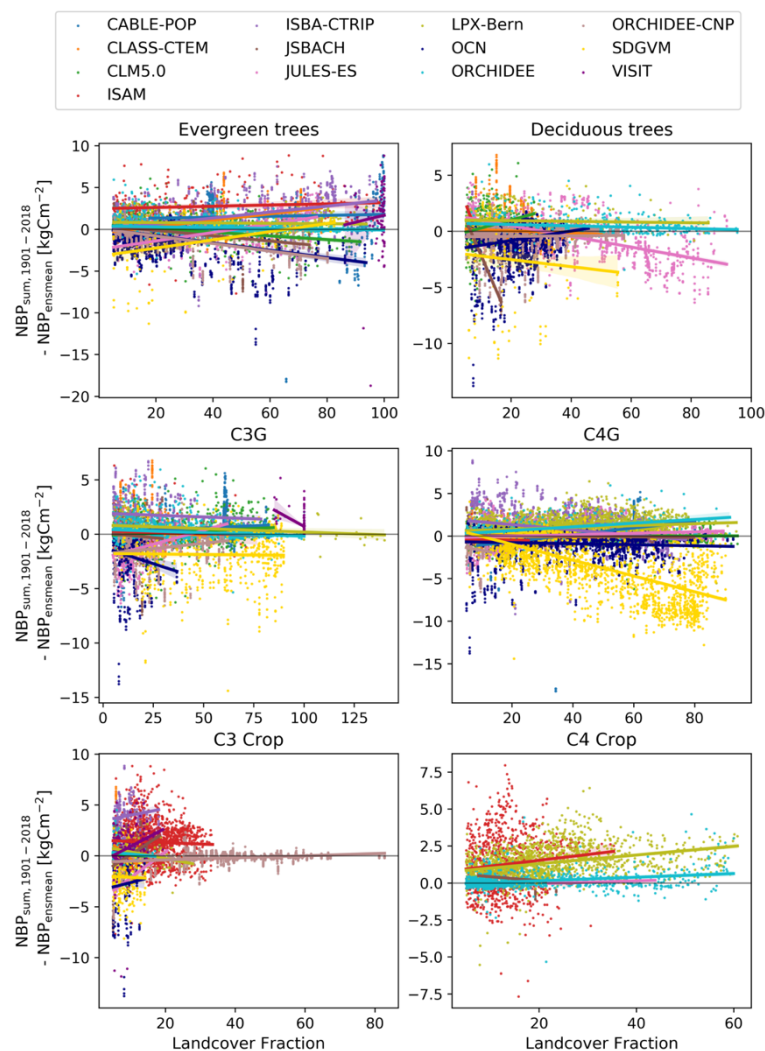

Figure 1: NBP sum over 1901-2018 minus the ensemble mean against the initial landcover fraction (1901-1930) for six different vegetation groups (evergreen trees, deciduous trees, C3 grasses (C3G), C4 grasses (C4G), C3 agriculture (C3 Crop) and C4 agriculture (C4 Crop)). The lines show the linear regression lines.

And vs the landcover fraction at the end of simulation (1989-2018):

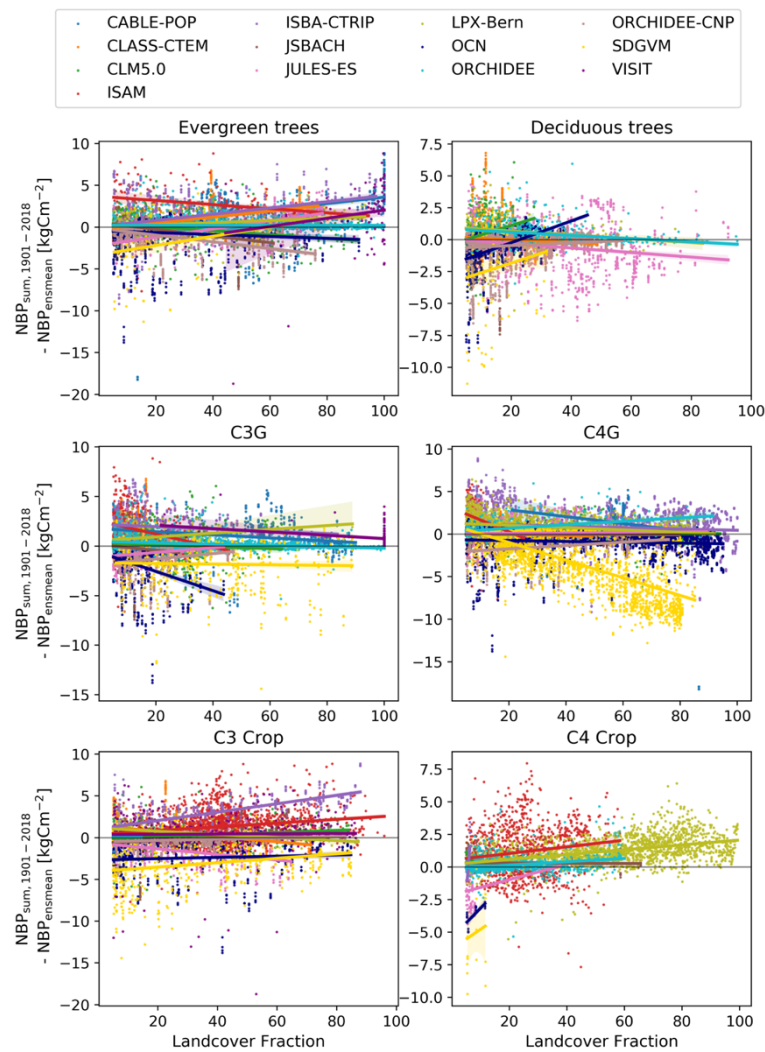

Figure 2: NBP sum over 1901-2018 minus the ensemble mean against the landcover fraction at the end of the simulation (1989-2018) for six different vegetation groups (evergreen trees, deciduous trees, C3 grasses (C3G), C4 grasses (C4G), C3 agriculture (C3 Crop) and C4 agriculture (C4 Crop). The lines show the linear regression lines.

In our opinion, unfortunately neither of the figures adds value to our manuscript. It is hard to see whether the deviation from the ensemble mean changes with the landcover.

We further looked at  $CVeg$  – ensemble mean (averaged over 1989-2018) vs the initial landcover fraction (1901-1930):

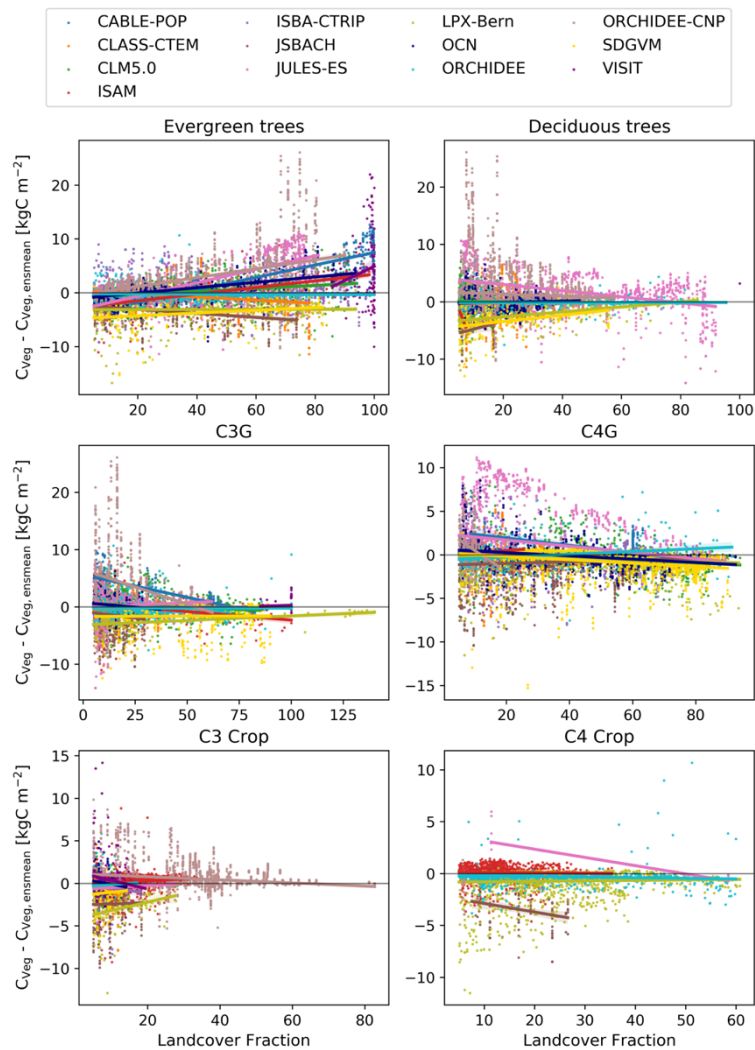

Figure 3: Average carbon stored in vegetation ( $CVeg$ ; 1989-2018) minus the ensemble mean against the initial landcover fraction (1901-1930) for six different vegetation groups (evergreen trees, deciduous trees, C3 grasses (C3G), C4 grasses (C4G), C3 agriculture (C3 Crop) and C4 agriculture (C4 Crop)). The lines show the linear regression lines.

And CVeg – ensemble mean (averaged over 1989-2018) vs landcover fraction (1989-2018):

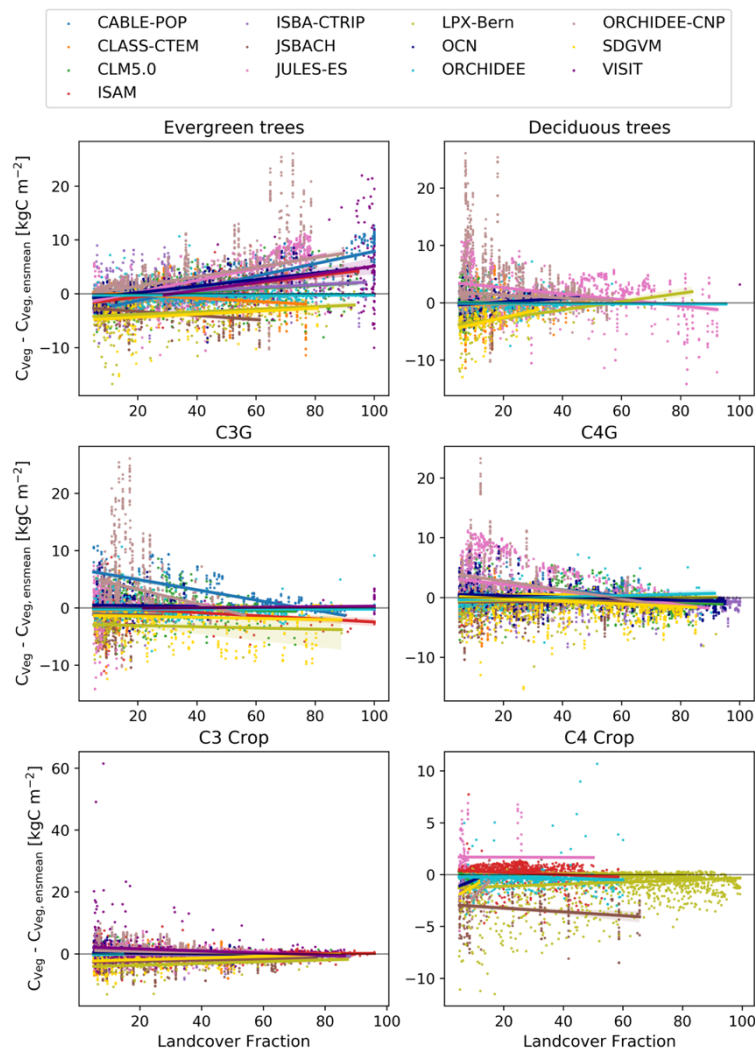

Figure 4: Average carbon stored in vegetation ( $C_{veg}$ ; 1989-2018) minus the ensemble mean against the landcover fraction at the end of the simulation (1989-2018) for six different vegetation groups (evergreen trees, deciduous trees, C3 grasses (C3G), C4 grasses (C4G), C3 agriculture (C3 Crop) and C4 agriculture (C4 Crop). The lines show the linear regression lines.

As opposed to the figure with NBP, here the vegetation groups deciduous trees, C3 grasses, C3 crops and C4 grasses appear to decrease with increasing landcover fraction. However, this is likely an artefact given that for most models there are more pixels with a landcover fraction with <30%.

Lastly, we explored the  $C_{\text{Soil}}$  pools ( $C_{\text{Soil}}$  – ensemble mean, averaged over 1989-2018) against the initial landcover fraction (1901-1930):

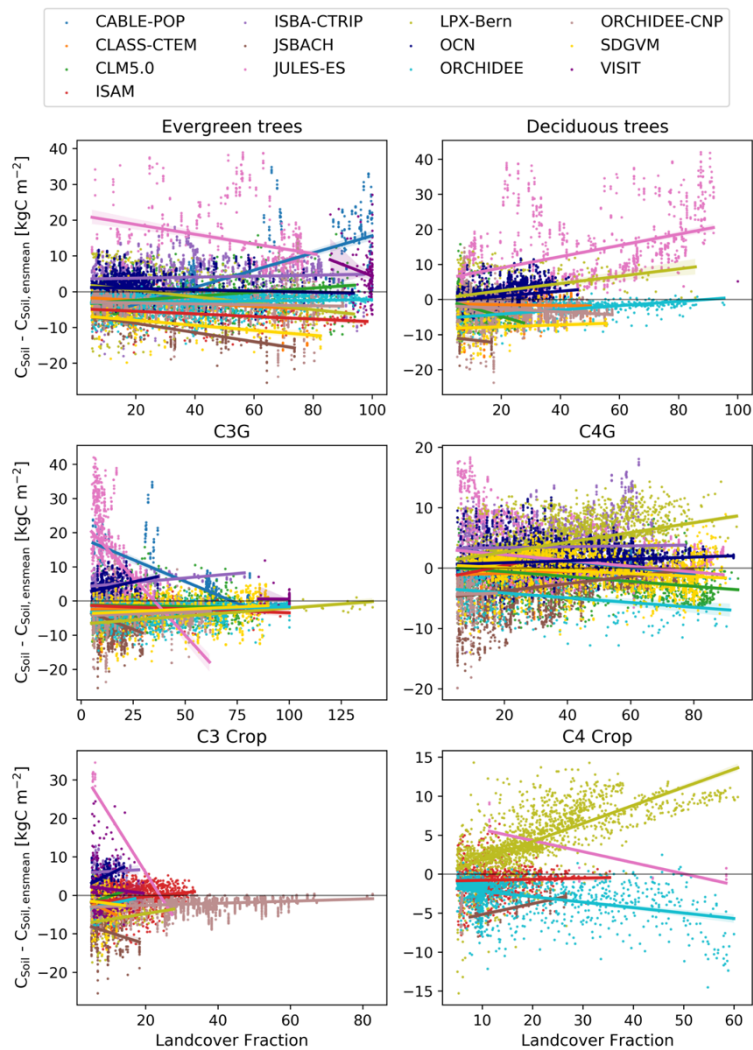

Figure 5: Average carbon stored in soil ( $C_{\text{Soil}}$ ; 1989-2018) minus the ensemble mean against the initial landcover fraction (1901-1930) for six different vegetation groups (evergreen trees, deciduous trees, C3 grasses (C3G), C4 grasses (C4G), C3 agriculture (C3 Crop) and C4 agriculture (C4 Crop). The lines show the linear regression lines.

And CSoil – ensemble mean vs landcover fraction (1989-2018):

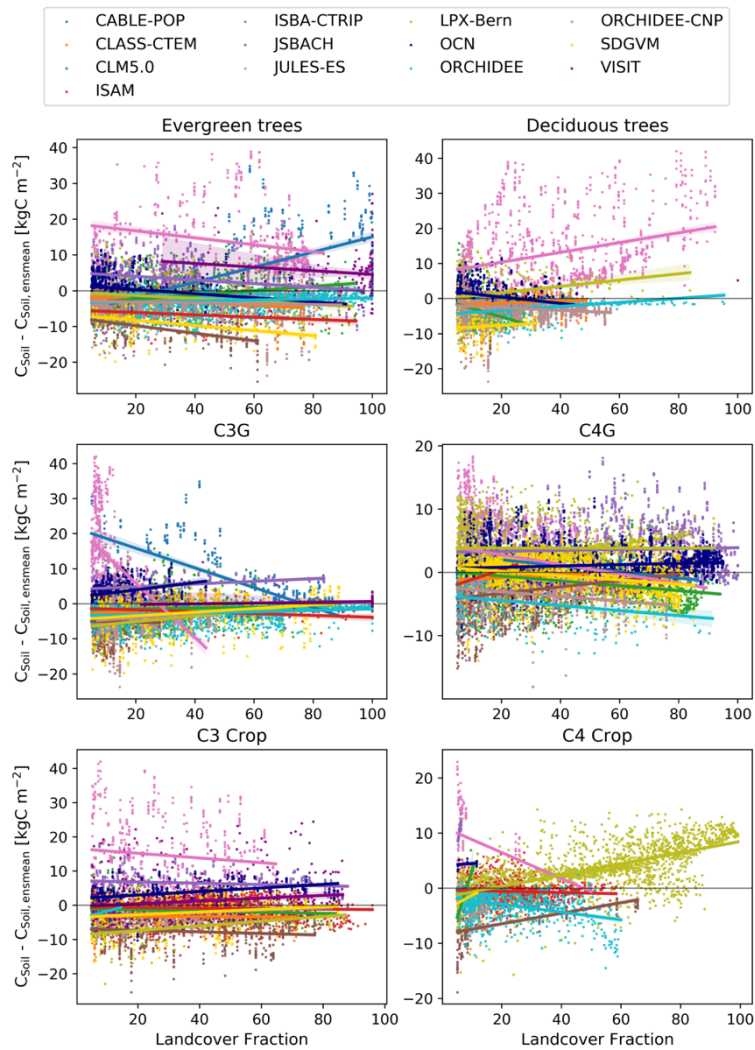

Figure 6: Average carbon stored in soil ( $C_{Soil}$ ; 1989-2018) minus the ensemble mean against the landcover fraction at the end of the simulation (1989-2018) for six different vegetation groups (evergreen trees, deciduous trees, C3 grasses (C3G), C4 grasses (C4G), C3 agriculture (C3 Crop) and C4 agriculture (C4 Crop). The lines show the linear regression lines.

Similar to the figure NBP vs landcover fraction, we do not think the CSoil figure would add value to our manuscript because it is hard to draw any conclusions. We have therefore opted to keep our original figure presentation in the manuscript.

The discussion of inter-annual variability in precipitation would also benefit from assessing the model differences in terms of PFT fraction. This is alluded to in the Discussion but could be explicitly evaluated.

Similar to above, we took the average over the years 1989-2018 for precipitation (CRUJRA reanalysis) and landcover fraction for the six different vegetation groups. We first compared the average precipitation against the landcover fraction:

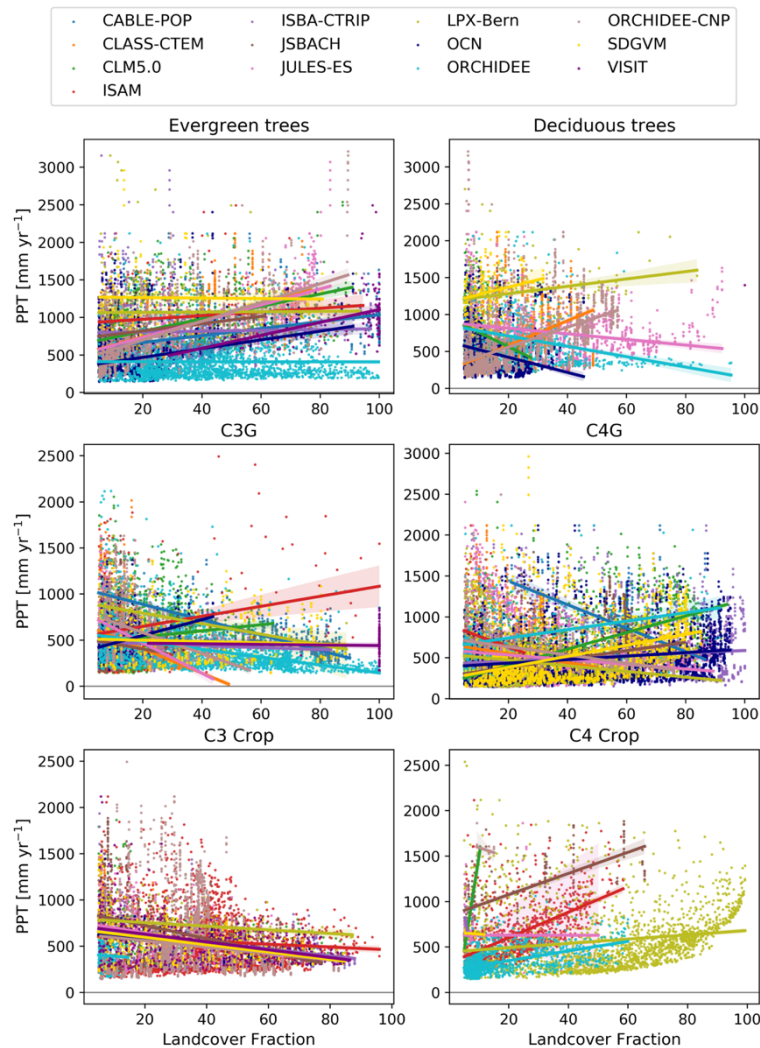

Figure 7: Average annual precipitation (PPT; 1989-2018) against the landcover fraction at the end of the simulation (1989-2018) for six different vegetation groups (evergreen trees, deciduous trees, C3 grasses (C3G), C4 grasses (C4G), C3 agriculture (C3 Crop) and C4 agriculture (C4 Crop). The lines show the linear regression lines.



And further compare the standard deviation (as a measure of interannual variability) against the landcover fraction:

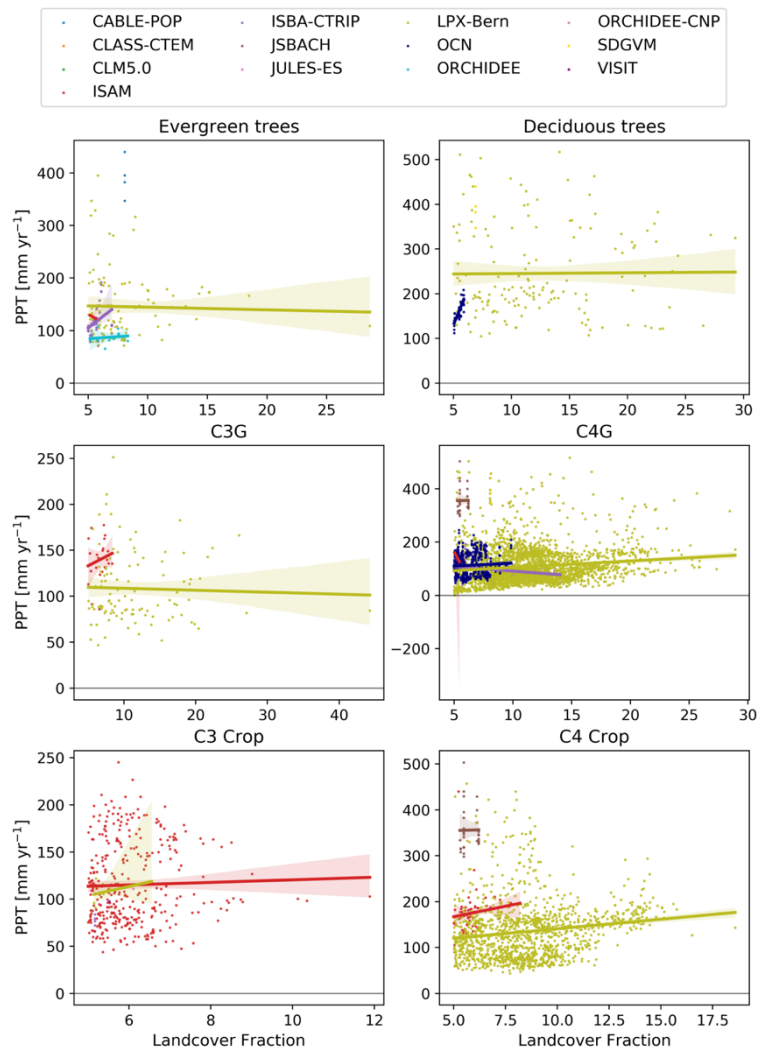

Figure 8: Standard deviation of annual precipitation (PPT) over 1989-2018 against the landcover fraction at the end of the simulation (1989-2018) for six different vegetation groups (evergreen trees, deciduous trees, C3 grasses (C3G), C4 grasses (C4G), C3 agriculture (C3 Crop) and C4 agriculture (C4 Crop). The lines show the linear regression lines.

Again, as shown in our earlier figures, the same issues apply. Furthermore, we don't necessarily think there is a mechanistic reason to assume a direct link between IAV of precipitation and land cover. This is because although IAV of rainfall would drive growth/mortality dynamics, these processes will be lagged and consequently the relationships are as seen, less clear.

Finally, analysis of differences in burned area relative to PFT fraction would be helpful.

Similar to above, we use the 1989-2018 average for the landcover fraction for the six different vegetation groups and the burned area fraction. Only six models provide burned area output.

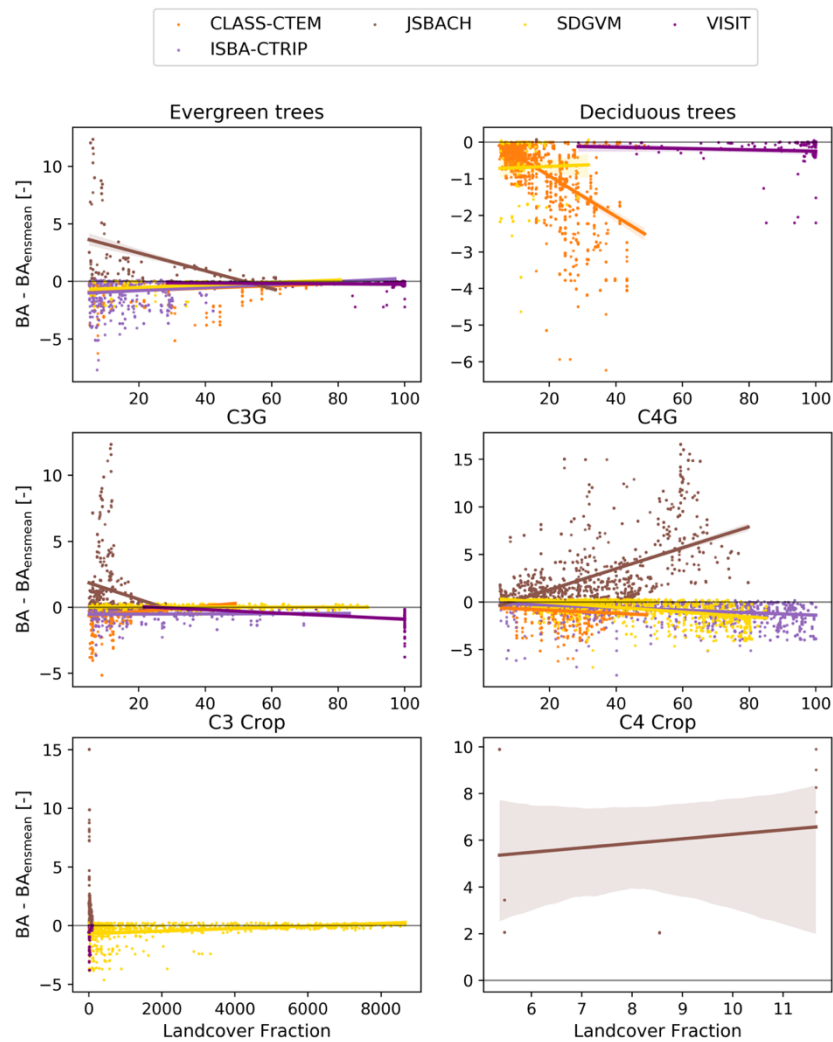

Figure 9: Average burned area fraction (BA; 1989-2018) minus the ensemble mean against the landcover fraction at the end of the simulation (1989-2018) for six different vegetation groups (evergreen trees, deciduous trees, C3 grasses (C3G), C4 grasses (C4G), C3 agriculture (C3 Crop) and C4 agriculture (C4 Crop). The lines show the linear regression lines.

For two groups (evergreen trees and C3 grasses) it looks like the deviation from the ensemble mean might decrease with increasing landcover fraction. However, it is obvious there are more data points in the 0-30% range for landcover fraction than for values greater than 30%. The other vegetation groups do not offer interesting insights in our opinion, and we therefore choose to not include this figure in the revised manuscript.

Plotting annual average NBP vs. annual average area burned (or emissions), with error bars, could help understand the role of fire on differences in NBP.

We thank the reviewer for the suggestion. We explored this in some detail, including plotting annual average burned area and fire CO<sub>2</sub> emissions against average NBP. Unfortunately, the results do not provide significant additional insights into the role of fire on NBP. We will try to explore this more in the future, but for this manuscript we have not added in further details.

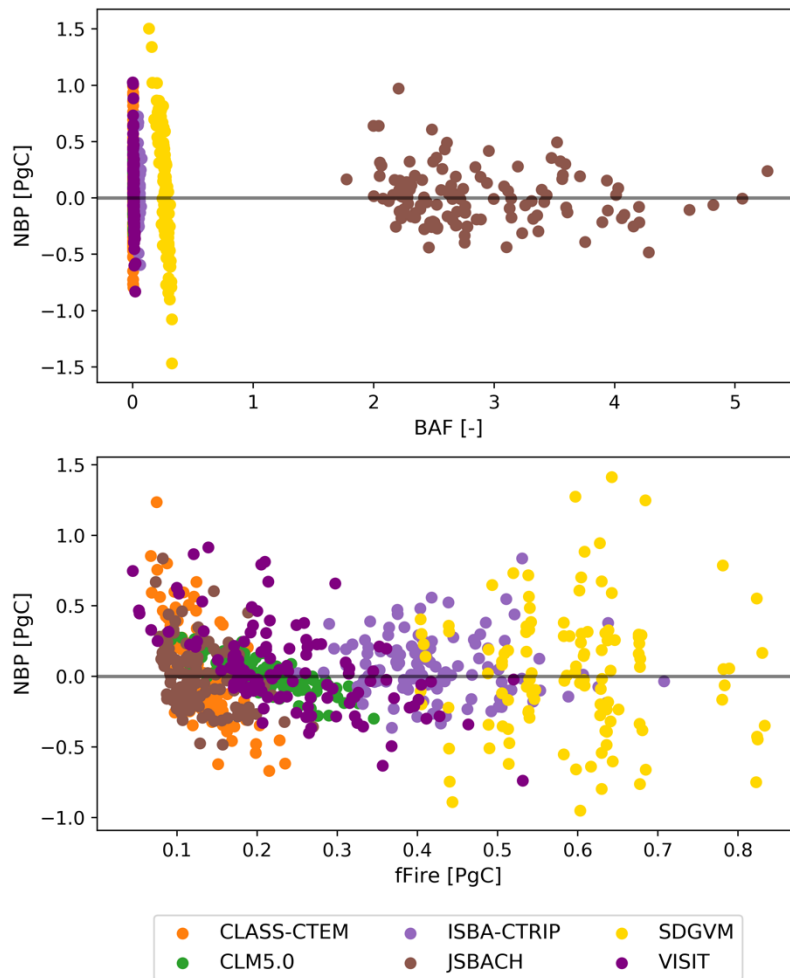

Figure 10: NBP against burned area fraction (BAF; upper panel) and NBP against fire CO<sub>2</sub> emissions (fFire; lower panel). All variables are averaged over the time period 1989-2018.

It might help if the Results and Discussion presented the variables contributing to differences among models in the same order. PFT fraction is presented last in the Results, but addressed first in the Discussion.

*We thank the reviewer for this suggestion, and we revised the structure of the discussion as suggested.*

The colors for each model are hard to distinguish in the time series plots. Maybe including different line types in addition to colors would help.

*We agree and have updated the figures accordingly.*

**Specific Comments:**

Lines 6-7: Is there a word missing in this sentence?

We changed the text to

*The TRENDY models simulated differing magnitudes of NBP on inter-annual timescales, and these differences resulted in significant differences in long-term vegetation carbon accumulation (-4.7-9.5 PgC).*

Lines 162-163: Plotting NBP anomaly vs ensemble spread would help make the point that years with extremely low or high NBP have large uncertainty more clear.

We thank the reviewer for the suggestion. However, as NBP varies around zero for all models, a 30-year-average will be close to zero, resulting in anomalies close to the actual NBP. In consequence, it is hard to see a difference between total NBP and NBP anomalies. We have shown this below (the first figure is the original and the second figure is the figure recreated with the anomalies). Consequently, as the anomaly does not provide any further insight, we have kept our original presentation in the manuscript.

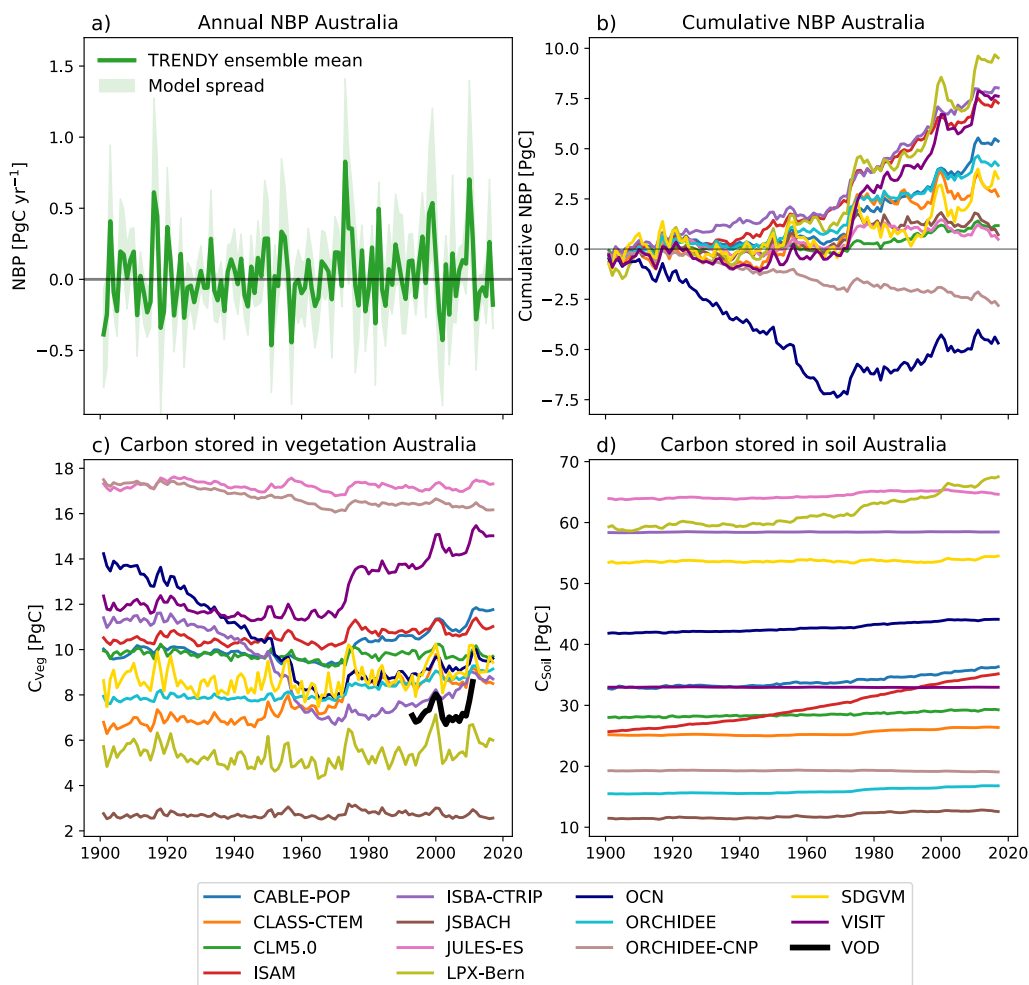

Fig 11: Original figure 1 in manuscript.

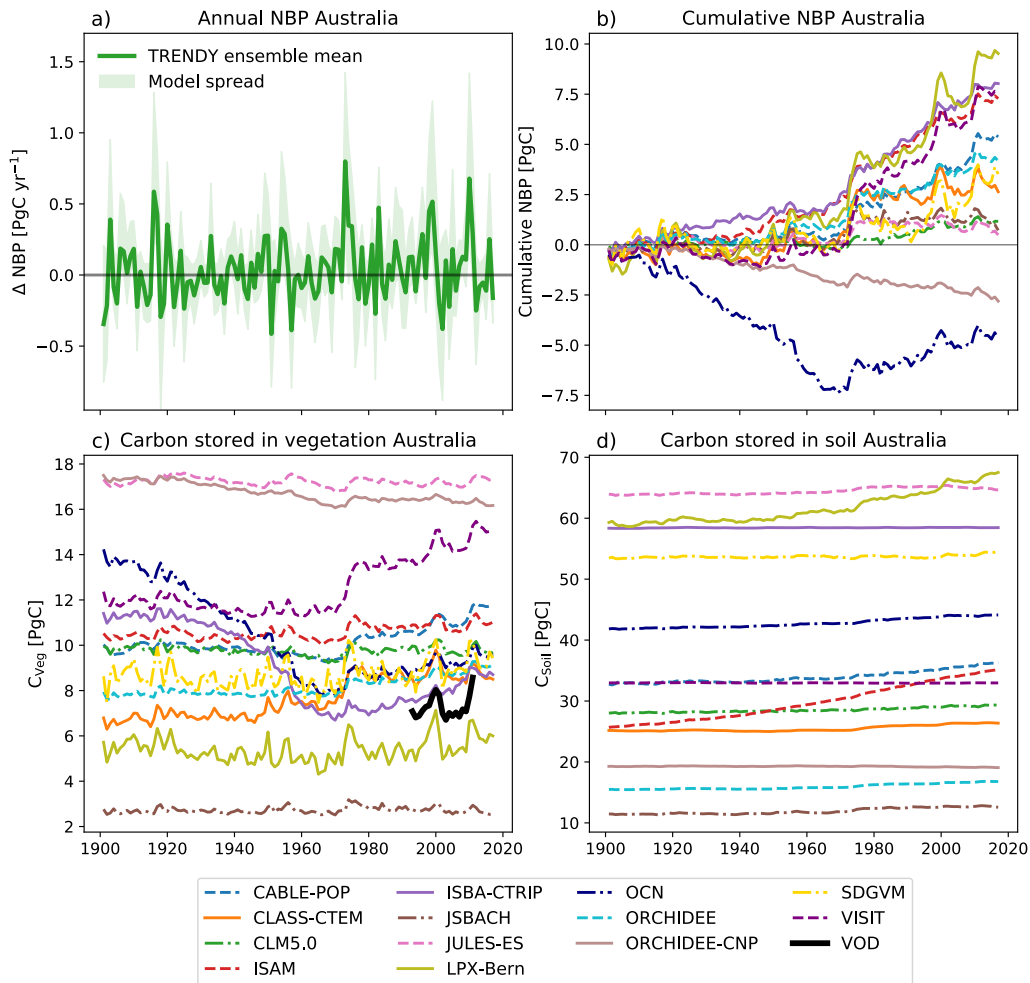

Figure 12: NBP anomalies instead of total NBP.

Figure 2: Plotting the differences between CO<sub>2</sub>-only and the other two experiments (similar to Figure B7, except summed over the simulations) for each model would make it easier to see the effects of climate and LUC.

*We thank the reviewer for their suggestion. We agree that this is a possible way to present the attribution. However, we would like to keep our presentation to show the combined effect of the different factors. This allows us to explore possible synergy effects between the three drivers CO<sub>2</sub>, climate, and land-use change.*

Figure 8. Showing observed land cover fraction would be helpful.

*We agree with the reviewer. While different datasets exist that describe the landcover in Australia, to our knowledge no dataset exists that describes both the extent of vegetation types as well as their fraction. The closest we could find was the MODIS/Terra vegetation continuous fields dataset which only includes the three vegetation groups (Tree, non-tree, not vegetated; see fig. 9). However, the MODIS product isn't trained for the specifics of the Australian environment (e.g., savanna ecosystems) and we have concerns that presenting it as an objective truth would not help the analysis.*

Line 297: Sentence "processes landcover/land use change" is missing "of".

*Thank you, we changed the text accordingly.*

Line 334: Change "an nitrogen cycle", to "a nitrogen cycle"

*Thank you, we changed the text accordingly.*

Line 359-360: These relationships, especially, between PFT fraction and residence time, could be checked relatively easily as suggested in my general comments.

*Thank you. As described above, we explored the different suggestions made and have come to the conclusion that unfortunately none of them would add value to our manuscript. One of the difficulties we were facing was that it is hard to compress all the information required into a comprehensible figure. Combining different vegetation groups for 13 models in form of scatter plots makes it hard to draw any conclusions. We alternatively discussed only showing the linear regression lines, however, while most models show significant linear relationships, the adjusted R-squared values are low and RMSE values high for most models for all variables. Therefore, we concluded the linear regression lines are not representative of the data but are too noisy to derive a meaningful linear relationship instead.*

Line 369: Change "was less important factor" to "was a less important factor"

*Thank you, we changed the text accordingly.*

Lines 441-456: Why not compare the parameterizations these 13 models used? That, in conjunction with the additional plots of NBP, carbon storage, and residence time by PFT fractions could allow for more comprehensive and informative conclusions as to why the models differ.

*It is difficult to compare the parameterisations directly outside of the individual schemes as the parameterisations are woven with the parameters chosen by each model, as well as issues like the timescales (i.e., changes in cover type and so dominant parameters) over which each scheme responds to the meteorological forcing. We have therefore not compared the 13 models because we do not think this would actually lead to insight. In the future direction we discuss the importance of the parametrisations and highlight that further work linking model parameters to emergent trait databases and field data (e.g., AusTraits database, Bloomfield et al., 2019, Togashi et al., 2015) is an important step to improve the model performance over Australia (see l. 446 – 452).*
